# Supplementary material
Source: PubMed Central journal article supplement (PMC4410688)

sFigure 1

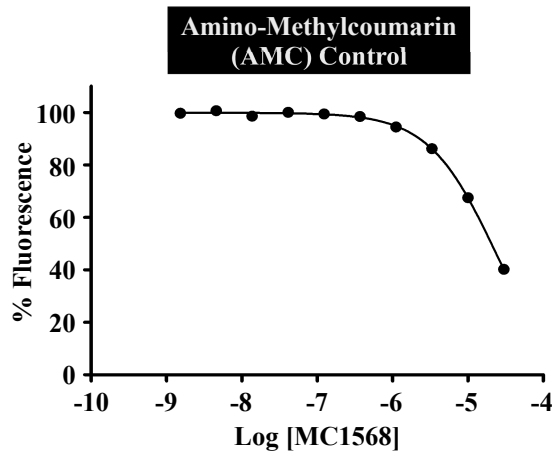

Supplement: NIHMS675637-supplement.pdf [file NIHMS675637-supplement.pdf]
